# Supplementary material for: Autoantibodies against M5-muscarinic and beta1-adrenergic receptors in periodontitis patients
Source: publisher site journal article supplement (doi:10.18632/aging.103864), 2020-08-28
Supplement: Supplementary file [file aging-v12i16-103864-supplementary-material-SD1.pdf]

## SUPPLEMENTARY FIGURES

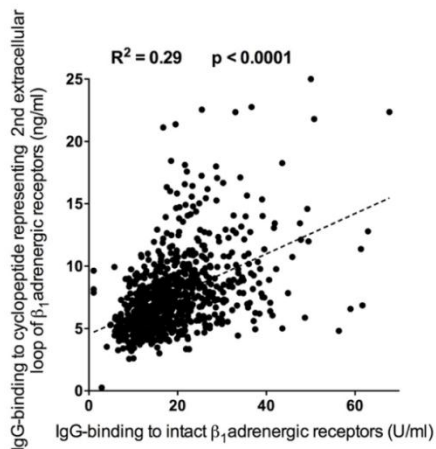

**Supplementary Figure 1.** Comparison of  $\beta_1$ AR-Aabs measured by IgG-binding to the native intact receptor (CellTrend GmbH) or to a cyclic peptide providing a valid representation of the presumed pathogenic conformational auto-epitope within the second extracellular loop of the receptor associated with the active receptor conformation [23].

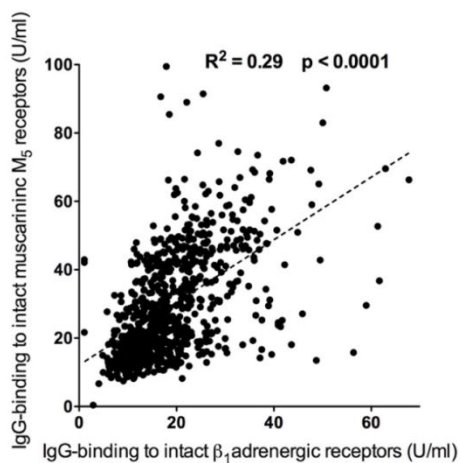

**Supplementary Figure 2.** Comparison of serum levels of  $\beta_1$ AR-Aabs and  $M_5$ R-Aabs in periodontitis patients. Both autoantibodies were measured by IgG-binding to the native intact receptor (CellTrend GmbH).
